*Kitaba et al*

1 **Fathers' preconception smoking and offspring DNA methylation: A two generation study**

2  
3 Negusse T Kitaba<sup>1\*</sup>, Gerd Toril Mørkve Knudsen<sup>2,3\*</sup>, Ane Johannessen<sup>4</sup>, Faisal I. Rezwan<sup>5</sup>,  
4 Andrei Malinovschi<sup>6</sup>, Anna Oudin<sup>7</sup>, Bryndis Benediktsdottir<sup>8,9</sup>, David Martino<sup>10</sup>, Francisco  
5 Javier Callejas González<sup>11</sup>, Leopoldo Palacios Gómez<sup>12</sup>, Mathias Holm<sup>13</sup>, Nils Oskar Jögi<sup>2,3</sup>,  
6 Shyamali C Dharmage<sup>14</sup>, Svein Magne Skulstad<sup>3</sup>, Sarah H Watkins<sup>15</sup>, Matthew Suderman<sup>15</sup>,  
7 Francisco Gómez-Real<sup>2,16</sup>, Vivi Schlünssen<sup>17,18</sup>, Cecilie Svanes<sup>3,4#</sup>, John W. Holloway<sup>1,19#</sup>.

8 \*Joint first authors

9 #Joint senior authors

10 <sup>1</sup>Human Development and Health, Faculty of Medicine, University of Southampton,  
11 Southampton, UK

12 <sup>2</sup>Department of Clinical Sciences, University of Bergen, Norway

13 <sup>3</sup>Department of Occupational Medicine, Haukeland University Hospital, Bergen, Norway

14 <sup>4</sup>Centre for International Health, Department of Global Public Health and Primary Care,  
15 University of Bergen, Norway

16 <sup>5</sup>Department of Computer Science, Aberystwyth University, Aberystwyth, UK

17 <sup>6</sup>Department of Medical Sciences: Clinical Physiology, Uppsala University, Sweden

18 <sup>7</sup>Section of Sustainable Health, Department of Public Health and Clinical Medicine, Umeå  
19 University, Sweden

20 <sup>8</sup>Department of Allergy, Respiratory Medicine and Sleep, Landspítali University Hospital,  
21 Reykjavik, Iceland

22 <sup>9</sup>Faculty of Medicine, University of Iceland, Iceland

23 <sup>10</sup>Wal-yan Respiratory Research Centre, Telethon Kids Institute, Perth, Australia

24 <sup>11</sup>Department of Pulmonology, Albacete University Hospital Complex, Albacete, Spain

25 <sup>12</sup>El Torrejón Health Centre, Andalusian Health Service, Huelva, Spain

26 <sup>13</sup>Occupational and Environmental Medicine, School of Public Health and Community  
27 Medicine, Institute of Medicine, University of Gothenburg, Sweden

28 <sup>14</sup>Centre for Epidemiology and Biostatistics, Melbourne School of Population and Global  
29 Health, University of Melbourne, Melbourne, Australia

30 <sup>15</sup>University of Bristol, MRC Integrative Epidemiology Unit, Population Health Sciences, Bristol  
31 Medical School, Bristol, United Kingdom

32 <sup>16</sup>Department of Gynaecology and Obstetrics, Haukeland University Hospital, Bergen, Norway

33 <sup>17</sup>Department of Public Health, Work, Environment and Health, Danish Ramazzini Centre,  
34 Aarhus University Denmark, Denmark

35 <sup>18</sup>National Research Center for the Working Environment, Copenhagen, Denmark

36 <sup>19</sup>NIHR Southampton Biomedical Research Center, University Hospitals Southampton,  
37 Southampton, UK

38

39 **Correspondence:**

40 Name: Prof John W. Holloway

41 Address: Human Development and Health, Faculty of Medicine, University of Southampton,  
42 Southampton SO16 6YD, UK

43 Tel: +44 23 8120 8758

44 Email: J.W.Holloway@soton.ac.uk

45

46 **Funding:**

47 Co-ordination of the RHINESSA study has received funding from the Research Council of  
48 Norway (Grants No. 274767, 214123, 228174, 230827 and 273838), ERC StG project BRuSH

49 #804199, the European Union's Horizon 2020 research and innovation programme under

50 grant agreement No. 633212 (the ALEC Study), the Bergen Medical Research Foundation, and  
51 the Western Norwegian Regional Health Authorities (Grants No. 912011, 911892 and  
52 911631). Study centres have further received local funding from the following: Bergen: the  
53 above grants for study establishment and co-ordination, and, in addition, World University  
54 Network (REF and Sustainability grants), Norwegian Labour Inspection, and the Norwegian  
55 Asthma and Allergy Association. Albacete and Huelva: Sociedad Española de Patología  
56 Respiratoria (SEPAR) Fondo de Investigación Sanitaria (FIS PS09). Gøteborg, Umeå and  
57 Uppsala: the Swedish Heart and Lung Foundation, the Swedish Asthma and Allergy  
58 Association. Reykjavik: Iceland University. Melbourne: National Health and Medical Research  
59 Council (NHMRC) of Australia (research grants 299901 and 1021275). Tartu: the Estonian  
60 Research Council (Grant No. PUT562). Århus: The Danish Wood Foundation (Grant No.  
61 444508795), the Danish Working Environment Authority (Grant No. 20150067134), Aarhus  
62 University (PhD scholarship). ALSPAC funding: EPIC arrays age 15-17, John Templeton  
63 Foundation (60828) and EPIC arrays age 24, MRC (MC\_UU\_12013/2) & CLOSER (MRC and  
64 ESRC).

65 Word Count (Main Body): 3918

66

#### 67 **Author Contributions**

68 Conceptualization: Cecilie Svanes, Gerd Toril Mørkve Knudsen, Faisal I Rezwan, Ane

69 Johannessen, Negusse Kitaba, John W Holloway

70 Data curation: Gerd Toril Mørkve Knudsen, Bente Skottvoll, Ane Johannessen, Negusse

71 Kitaba, John W Holloway

72 Formal analysis: Negusse Kitaba, Cecilie Svanes, John W Holloway

73 Methodology: Negusse Kitaba, Faisal I Rezwan, Cecilie Svanes, John W Holloway

74 Replication: Sarah Watkins, Matthew Suderman

75 Project administration: Cecilie Svanes

76 Writing – original draft: Negusse Kitaba, Gerd Toril Mørkve Knudsen, Cecilie Svanes, John W

77 Holloway

78

79 Writing – review, editing and final approval: All authors

80

81 **Running title:** Paternal smoking and offspring DNA methylation

82

83 **Abstract**

84 **Rationale:** Experimental studies suggest that exposures may impact respiratory health across  
85 generations via epigenetic changes transmitted specifically through male germ cells. Studies  
86 in humans are however limited. We aim to identify epigenetic marks in offspring associated  
87 with father's preconception smoking.

88 **Methods:** We conducted epigenome-wide association studies (EWAS) in the RHINESSA cohort  
89 on father's any preconception smoking (N=875 offspring) and father's pubertal onset smoking  
90 <15 years (N=304), using Infinium MethylationEPIC Beadchip arrays, adjusting for offspring  
91 age, maternal smoking and personal smoking. EWAS of maternal and offspring personal  
92 smoking were performed for replication.

93 **Results:** Father's smoking commencing preconception was associated with methylation of  
94 blood DNA in offspring at two Cytosine-phosphate-Guanine sites (CpGs) (False Discovery Rate  
95 (FDR) <0.05) in *PRR5* and *CENPP*. Father's pubertal onset smoking was associated with 19  
96 CpGs (FDR <0.05) mapped to 14 genes (*TLR9*, *DNTT*, *FAM53B*, *NCAPG2*, *PSTPIP2*, *MBIP*,  
97 *C2orf39*, *NTRK2*, *DNAJC14*, *CDO1*, *PRAP1*, *TPCN1*, *IRS1* and *CSF1R*). These differentially

98 methylated sites were hypermethylated and associated with promoter regions capable of  
99 gene silencing. Some of these sites were associated with offspring outcomes in this cohort  
100 including ever-asthma (NTRK2), ever-wheezing (DNAJC14, TPCN1), weight (FAM53B, NTRK2)  
101 and BMI (FAM53B, NTRK2) ( $P < 0.05$ ). Pathway analysis showed enrichment for gene ontology  
102 pathways including regulation of gene expression, inflammation and innate immune  
103 responses.

104 **Conclusion:** Father's preconception smoking, particularly in puberty, is associated with  
105 offspring DNA methylation, providing evidence that epigenetic mechanisms may underly  
106 epidemiological observations that pubertal paternal smoking increases risk of offspring  
107 asthma, low lung function and obesity.

108

109 **Key Words:** Preconception, paternal effects, tobacco smoke, epigenetic, Epigenome-Wide  
110 Association Study, DNA methylation, RHINESSA

111 **Introduction**

112 There is growing consensus that perturbations of the epigenome through parental exposures  
113 even before their offspring are conceived may explain some of the variation in the heritability  
114 of health and disease not captured by Genome-Wide Association Studies (GWAS). The period  
115 of puberty in future parents, in particular fathers, may represent a critical window of  
116 physiological change and epigenetic reprogramming events, which may increase the  
117 individual's susceptibility for environmental exposures to be embodied in the developing  
118 gametes<sup>1,2</sup>. Animal and human studies have shown that prenatal as well as personal exposure  
119 to smoking are associated with epigenetic modifications that impact on sperm count and  
120 quality<sup>3</sup>. There is now growing interest in how epigenetic modifications, such as DNA  
121 methylation (DNAm), related to the parental *preconception* period may influence the health  
122 of the *next generation*<sup>4</sup>.

123 Although smoking rates are generally declining, smoking commencing before the age of 15 is  
124 increasing<sup>5,6</sup>. Epidemiological studies have demonstrated that father's smoking in adolescent  
125 years may be a causal factor for poorer respiratory health in offspring. Both fathers' smoking  
126 initiation before age 15 and smoking duration before conception have been associated with  
127 more asthma and lower lung function in offspring<sup>7-9</sup>. Father's preconception smoking onset  
128 has also been associated with higher body fat mass in sons<sup>10-13</sup>.

129 Epigenome-Wide Association Studies (EWAS) have identified extensive methylation  
130 biomarkers associated with personal smoking, all-cause mortality in current and former  
131 smokers, as well as mother's smoking during pregnancy<sup>6,14-17</sup>. While previous studies have  
132 identified DNA methylation signals in offspring blood<sup>18</sup> and cord blood<sup>19</sup> related to father's  
133 smoking, they have not specifically investigated the timing of exposure, partly because  
134 detailed smoking information from fathers is rarely available<sup>20</sup>. Methylation markers

135 associated with paternal preconception smoking, could have an important role in elucidating  
136 long-term effects on the offspring epigenome, with the potential for developing efficient  
137 intervention programs and improved public health.

138 This study aimed to investigate whether DNA methylation of DNA measured in offspring blood  
139 is associated with fathers' smoking commencing before conception, and in particular, with  
140 fathers' smoking starting in (pre)pubertal years (before age 15). We hypothesized that  
141 epigenetic changes involving DNA methylation may explain the molecular mechanisms  
142 underlying the association between fathers' smoking preconception and offspring health  
143 observed in epidemiological studies. Additionally, we hypothesized that fathers' smoking in  
144 the critical window of early puberty may have a more significant impact on the offspring  
145 epigenome. In a two-generation cohort, we sought to identify the DNA methylation changes  
146 in offspring blood associated with (1) father's smoking onset preconception compared with  
147 never or later onset smoking, and (2) father's smoking onset before age 15 compared with  
148 never smoking.

149

150

151 **Methods**

152 **Study design and data**

153 We used data and samples from offspring that participated in the RHINESSA study  
154 ([www.rhinessa.net](http://www.rhinessa.net)). Parent data, including detailed information on smoking habits, were  
155 retrieved from the population-based European Community Respiratory Health Survey  
156 (ECRHS, [www.ecrhs.org](http://www.ecrhs.org)) and/or the Respiratory Health in Northern Europe study (RHINE,  
157 [www.rhine.nu](http://www.rhine.nu)) studies. This analysis comprised 875 offspring-parent pairs with complete  
158 information, from six study centres with available peripheral blood for offspring (Aarhus,  
159 Denmark; Albacete/Huelva, Spain; Bergen, Norway; Melbourne, Australia; Tartu, Estonia). All  
160 participants were of Caucasian ancestry. Medical research committees in each study centre  
161 approved the studies, and each participant gave written consent.

162 Father's smoking and age of starting/quitting was reported in interviews/questionnaires, and  
163 related to offspring's birth year, to define the categories: never smoked (N=547), any  
164 preconception smoking (N=328), preconception smoking with onset <15 years (pubertal  
165 smoking) (N=64) (cut point based on mean age of voice break 14.5 years, first nocturnal  
166 seminal emission 14.8 years). Personal smoking was classified as current, ex- or never  
167 smoking. Maternal smoking was defined by offspring's report on mothers' smoking during  
168 their childhood/pregnancy.

169 DNAm in offspring was measured using Illumina Infinium MethylationEPIC Beadchip arrays  
170 (Illumina, Inc. CA, USA) and data processed using an established pipeline as detailed in the  
171 online supplement. Following processing 726,661 CpGs were retained for analysis.

172 **Statistical analysis**

173 Two EWAS on preconception paternal smoking as exposure (any preconception smoking,  
174 prepuberty smoking) using robust regression were run with offspring blood DNA methylation



175 as outcome adjusting for offspring's sex, age, personal and mother's smoking, study center  
176 and cell-type proportions at significance level of false discovery rate (FDR) corrected p-value  
177 <0.05. Inflation from systematic biases was adjusted using BACON. Differentially methylated  
178 regions were detected using DMRCate and dmrrf. In additional analyses, associations  
179 between fathers' any preconception smoking and offspring's DNA methylation were also  
180 stratified by offspring sex. Biological interpretation of significant dmCpGs is detailed in the  
181 supplementary methods.

182 We compared our EWAS results with findings from meta-analyses of EPIC array DNA  
183 methylation associated with personal smoking from four population-based cohorts<sup>21</sup>,  
184 personal smoking-methylation effects from 16 cohorts using 450K arrays<sup>16</sup>; and the  
185 Pregnancy and Childhood Epigenetics Consortium (PACE) meta-analysis of mother's smoking  
186 in pregnancy on offspring cord blood methylation<sup>22</sup> to assess the shared count of dmCpG sites  
187 at (FDR<0.05) for the overlap between each EWAS.

#### 188 *Replication analysis*

189 Replication was carried out in the ALSPAC (Avon Longitudinal Study of Parents and Children)  
190 cohort adjusted for predicted cell count proportions, batch effects (plate), maternal smoking  
191 during pregnancy, self-reported own smoking, age and sex using DNA methylation data from  
192 whole blood measured at age 15-17. A description of the ALSPAC cohort is provided in the  
193 supplementary methods. T-tests were used to compare the association of regression  
194 coefficient of RHINESSA's dmCpG sites at FDR <0.05 and the top 100 CpG sites with ALSPAC.  
195 Signed tests were used to test the direction of association.

#### 196 **Sensitivity analyses**

197 To assess the effect of social class, father's education was used as a proxy for social class. In  
198 order to see the effect of CpGs changing with age, the correlation of methylation at dmCpGs

199 known to be associated with offspring age, known aging markers from RHINESSA EWAS,  
200 dmCpG sites for father smoking before age 15, and offspring age was assessed. To further  
201 investigate whether the identified dmCpGs were associated with respiratory outcomes and  
202 weight in the offspring, we conducted regression analysis between offspring's DNA  
203 methylation signals and offspring's own reports of ever-asthma, ever-wheeze, weight and  
204 BMI, while accounting for offspring sex

205

## 206 **Results**

207 The analysis included 875 RHINESSA participants (Table 1A), 457 males and 418 females, aged  
208 7 to 50 years. Of these 328 had a father who had ever smoked of which 64 had started before  
209 age 15 years; 263 had a mother who had ever smoked, and 240 had smoked themselves.  
210 Characteristics are also given for the sub-sample of 304 offspring whose father either had  
211 started smoking before age 15 years, or never smoked (Table 1B).

212

### 213 **Epigenome wide association analysis of preconception father's smoking**

214 Epigenome-wide association between father's any preconception smoking and offspring DNA  
215 methylation identified two dmCpGs (inflation  $\lambda=1.187$ ); cg00870527 mapped to *PRR5* and  
216 cg08541349 mapped to *CENPP* (Table 2A, and supplementary table E1). The genome-wide  
217 distribution of associated dmCpGs is shown in Figure 1A. The comparison of methylation  
218 distribution between never- and ever-smoke exposed is shown in Figure 1C.

219

220 In sex-stratified analysis, in males (N=457) we identified four dmCpGs mapped to *KCNJ1*,  
221 *GRAMD4*, *TRIM2* and *MYADML2*. In females (N=418) there was one dmCpG mapped to

222 LEPROT1 (FDR  $\leq 0.05$ ) ( Supplementary Table E2). All sex-specific dmCpGs were  
223 hypomethylated.

224

225 To specifically determine the signature related to father's early onset smoking, we compared  
226 methylation differences between offspring of fathers who started to smoke  $<15$  years ( $n=64$ )  
227 with offspring of never smoking fathers ( $n=240$ ). We identified 55 dmCpGs at FDR  $<0.05$   
228 ( $\lambda=1.44$ ) showing genome-wide significance. After adjusting for inflation using BACON, 19  
229 dmCpGs showed significant association at FDR  $<0.05$  with  $\lambda=1.29$  (Table 2B, Figure 1B, and  
230 supplementary Table E3). These dmCpGs were mapped to 14 known genes and 5 intergenic  
231 regions. The genes include TLR9, DNNT, FAM35B, NCAPG2, MBIP, C2orf39, NTRK2, DNAJC14,  
232 CDO1, PRAP1, TPCN1, IRS1, PSTPIP2, and CF1R. All hits were hypermethylated in the exposed  
233 group. The comparison of methylation distribution between the never and smoke exposed is  
234 shown in Figure 1D.

235

236 The dmCpGs associated with father's preconception smoking were mainly located in open-  
237 sea genomic features and enriched for promoter regions (Table 2A). The dmCpGs associated  
238 with father's pubertal smoking were in open-sea genomic features and CpG island shores  
239 (flanking shore regions,  $<2$  kb up-and downstream of CpG islands) and enriched for CpG  
240 islands and gene bodies (Table 2B).

241

#### 242 **Father's preconception smoking signatures as compared with signatures of personal and** 243 **mother's smoking**

244 To compare the effects of father's preconception and pubertal smoking on the offspring  
245 epigenome with that of other smoking exposures, the epigenome-wide effects of offspring's

246 own smoking as well as their mother's smoking during pregnancy and childhood were  
247 assessed. We identified 33 dmCpGs related to personal smoking, and 14 dmCpGs associated  
248 with mother's smoking (FDR<0.05) (Supplementary Tables E4 and E5, respectively).

249

250 To illustrate the distinct and shared genome-wide effects of personal, mother's, and father's  
251 smoking on the offspring methylome, we generated a locus-by-locus genome comparison,  
252 (Figure 2A). While there was similarity between the effects of personal smoking and mother's  
253 smoking on chromosome 5, we observed distinct signatures for father's preconception  
254 smoking on chromosome 22, and for mother's smoking exposure on chromosomes 7 and 15.

255

256 Comparing our EWAS results with findings from previous studies showed that 10 of the  
257 dmCpGs we identified as related to maternal smoking, and 20 (14+6) and 19 (14+5) of the  
258 dmCpGs identified as related to personal smoking, were present in the relevant meta-  
259 analyses<sup>16,2122</sup> (Figures 2B and 2C). However, when we compared our top 100 dmCpGs for  
260 father's any preconception smoking onset EWAS with mother's smoking, there was no  
261 evidence for shared CpGs (Figure 2B). For father's pubertal smoking, only two CpG sites  
262 (cg11380624 (*DNAJC14*), cg20728490 (*DNTT*)) were shared with analyses of personal smoking  
263 by Joehanes et al.<sup>21</sup> and two sites (cg12053348 (intergenic), cg20728490 (*DNTT*)) with  
264 Christiansen et al.<sup>16</sup>, while 16 CpG sites were unique (Figure 2C).

265

#### 266 **Enrichment of dmCpGs for related traits**

267 We investigated whether the significant dmCpGs associated with father's preconception  
268 smoking onset overlapped with other traits, using the repository of published EWAS literature  
269 in the EWAS atlas. The top 23 dmCpG sites for father's any preconception smoking (those

270 with p-value  $\leq 9.86 \times 10^{-06}$ , distinctly lower than the following sites) were enriched for traits  
271 that include Immunoglobulin E (IgE) level, muscle hypertrophy, maternal smoking, and  
272 birthweight (Figure 3A). dmCpGs (FDR<0.05) associated with father's pubertal smoking were  
273 enriched for traits such as autoimmune diseases, atopy, smoking, and puberty (Figure 3B).  
274 For comparison, maternal and personal smoking dmCpGs were enriched for shared traits  
275 including aging, birthweight, cognitive function, lung function, smoking and type 2 diabetes  
276 and cancers – whereas IgE level and atopy were specifically enriched in paternal smoking  
277 (Figure 3C and 3D).

278

#### 279 **Role of dmCpGs for father's pubertal smoking (smoking initiation < 15 years)**

280 Given the stronger effects of father's pubertal smoking we further explored the biological  
281 relevance of these findings.

#### 282 **Transcription factor enrichment**

283 We interrogated eFORGE TF for transcription factor enrichment in CD4<sup>+</sup> cells to determine  
284 the regulatory role of our 19 significant dmCpGs (FDR<0.05) related to father's pubertal  
285 smoking. We found significant enrichment of 27 transcription factor binding sites that  
286 overlapped with 7 of the dmCpGs (q-value<0.05) identified in our EWAS study  
287 (Supplementary Table E6).

288

#### 289 **EWAS atlas lookup**

290 Of the 19 dmCpGs associated with father's pubertal smoking identified in our analysis, 11  
291 were present in the EWAS atlas and correlated with gene expression in a variety of tissues in  
292 the EWAS atlas (Figure 4A) and overlapped with promoters (Figure 4B) (FDR <0.05). These  
293 were significantly associated with 9 other traits, including atopy and fractional exhaled nitric

294 oxide (cg23021329), smoking (cg20728490; cg16730908), BMI (cg03516318), Acute  
295 Lymphoblastic Leukemia (cg2240207), cancer (cg11380624), and Crohn's disease  
296 (cg10981514), (Supplementary Table E7).

297

### 298 **Differentially methylated region (DMR) analysis**

299 No DMRs were significantly associated with father's any preconception smoking using either  
300 DMRcate or dmrff. There were suggestive hits for father's pubertal smoking, such as DNNT at  
301 FDR= 0.084. All DMRs are listed in supplementary Table E8.

302

### 303 **Pathway enrichment**

304 To gain further insight into the functional roles of the dmCpGs, we used 14 genes that were  
305 mapped to dmCpGs associated with father's pubertal smoking to generate a protein-protein  
306 interaction network from the String database. The top 20 protein interactors were included  
307 with high confidence score cutoff 0.7 from protein-protein interaction data sources including  
308 experimentally validated protein physical complexes, curated databases and co-expressions.  
309 The network indicated that immune response related genes *TLR9*, *CSF1R*, *NTRK2*, *PSTPIP2*,  
310 *PTPN11* and *IL34* were well connected (Figure 5A) (p-value  $<1.0 \times 10^{-16}$ ). The molecular  
311 function enrichment analysis showed enrichment for gene expression, inflammatory  
312 response, innate immunity, and cytokine binding (Figure 5B). We also assessed enrichment  
313 of GO terms using gometh. The most significantly enriched biological process terms  
314 (FDR<0.05) include: Inactivation of MAPK activity involved in osmosensory signaling pathway  
315 (GO:0000173), negative regulation of interleukin-6 production (GO:0032715), regulation of  
316 mast cell chemotaxis (GO:0060753), regulation of neutrophil migration (GO:1902622) and  
317 insulin processing (GO:0030070) (Supplementary Table E9).

318

319 **Replication of DNA methylation signatures associated with father's preconception smoking**

320 The replication cohort in ALSPAC included 542 participants (female=280, male=262), of whom  
321 86 had a father who started to smoke before the age of 15 and 456 had never-smoking  
322 fathers. There was no overlap of dmCpG sites significantly associated with father's smoking  
323 before age 15 between the two cohorts (FDR<0.05). However, of the 19 significant dmCpGs  
324 identified as related to father's pubertal smoking in RHINESSA, 11 showed nominal replication  
325 in ALSPAC ( $p < 0.05$ ) with similar direction. The correlation of effects between studies is  
326  $R=0.49$ . The binomial sign test showed the association to be significant at  $p < 0.05$ . Expanding  
327 the comparison to the top 100 dmCpGs in RHINESSA, the correlation of effects between  
328 studies,  $R = 0.54$ ,  $p\text{-value} = 3.04 \times 10^{-05}$ .

329

330 **Sensitivity analyses**

331 In order detect whether the associations identified were influenced by social class, we carried  
332 out regression analysis between paternal smoking associated dmCpGs as outcome and  
333 father's education as exposure. No association was found.

334 In order to see the effect of CpGs changing with age, we compared known aging-related CpG  
335 markers identified from Rhinessa EWAS and paternal smoking dmCpGs with offspring age.  
336 There was only weak correlation between paternal smoking dmCpGs and offspring age  
337 (maximum  $R = |0.2|$ , with 9 CpGs  $R = 0$ ). In contrast, the age-related CpG markers showed a  
338 strong correlation with age ( $R \geq |0.6|$ ) (Supplementary Figure 1).

339 In order to determine whether paternal smoking dmCpGs were associated with offspring  
340 outcomes we ran logistic and linear regression on ever-asthma, ever-wheezing, weight and  
341 BMI. Some dmCpG sites showed association with ever-asthma (cg22402007: NTRK2), ever-

342 wheezing (cg11380624: DNAJC14, cg10981514: TPCN1), weight (cg12053348, cg03380960:  
343 FAM53B, cg22402007: NTRK2<sup>23</sup>) and BMI (cg03380960: FAM53B, cg12053348, cg22402007:  
344 NTRK2) at  $P < 0.05$  as shown in (Supplementary Table E10). The study power is shown in  
345 Supplementary Table E11.

346  
347 **Discussion**

348 To our knowledge, this is the first human study to investigate the potential epigenetic  
349 mechanisms behind the impact of father's pubertal smoking on offspring. In this epigenome-  
350 wide association study, using data from two generations of study participants, we found  
351 differentially methylated CpG sites in offspring associated with father's preconception  
352 smoking. Signatures related to father pubertal smoking (smoking initiation before age 15)  
353 were much more pronounced than smoking starting at any time preconception. Sixteen of  
354 our identified dmCpGs have not previously been reported to be associated with personal or  
355 maternal smoking. We suggest these new smoking-associated methylation biomarkers may  
356 be specific to smoking exposure of future fathers in early puberty. Several top dmCpGs were  
357 enriched for promoter regions and overlapped with significant transcription factor sites that  
358 correlated with gene expression in a variety of tissues. Besides unique sites identified for  
359 father's preconception smoking onset, our study confirms previously reported DNA  
360 methylation sites associated with personal and mother smoking, demonstrating the validity  
361 of our cohort and analytical methods. The genes to which dmCpGs map are related to  
362 regulation of innate immunity and inflammatory responses.

363  
364 For father's any preconception smoking, we found two novel CpG sites that were not  
365 previously linked with any previously investigated smoking phenotype. PRR5 (mapped with  
366 cg008870527) is a component of the (mTOR) complex 2 which is upstream of major pathways



367 known to have a crucial role in metabolic regulation and is suggested to play a role in obesity  
368 and the pathogenesis of insulin resistance<sup>24</sup>. CENPP (mapped with cg08541349), has been  
369 associated with lung function, leucocyte count, BMI and type II hypersensitivity reaction in  
370 GWAS studies<sup>25</sup>. In the male EWAS analysis, gene KCNJ1 is known to be associated with vital  
371 capacity and linked with obesity. A population-based study of Hispanic children has shown  
372 association of GRAMD4 with IgE levels (relevant to asthma pathogenesis)<sup>26</sup>. TRIM2 is linked  
373 with low density lipoprotein measurement and total cholesterol, while MYADML2 is linked  
374 with vital capacity and BMI-adjusted waist-hip ratio. Of the female EWAS hits, LEPROTL1 has  
375 a role in lung function (FEV1/FVC ratio) and several cancers, and a regulatory effect on growth  
376 hormone action and glucose homeostasis<sup>27</sup>.

377 For father's pubertal smoking, two of our 19 significant CpG sites, have previously been  
378 associated with personal smoking (cg20728490 in *DNTT* and cg16730908 in *PSTPIP2*), and  
379 they map to genes with important roles in innate immune responses to infections<sup>28,29</sup>.  
380 Upregulation of *PSTPIP2* has also been linked to neutrophilic airway inflammation and non-  
381 allergic asthma. When exploring the biological impact of other genes mapped to the dmCpGs  
382 uniquely associated with father's pubertal smoking, several were related to genes associated  
383 with innate immunity, allergic diseases, and asthma development, such as *TLR9*, *CSF1R*,  
384 *DNAJ14*, *NTRK2* and *TPCN1*<sup>28-33</sup>. We also identified CpGs and genes with links to obesity  
385 (*NTRK2*, *PSTPIP2*, *MBIP*)<sup>25,35</sup>, and glucose and fat metabolism (*IRS1*). The differentially  
386 methylated CpGs were mainly located in open-sea genomic features, and enriched for  
387 promoter regions, CpG island and gene bodies. These findings suggest that the identified DNA  
388 methylation differences, even though of relatively small magnitude, have functional  
389 implications in terms of a regulatory role in specific gene expression. Pathway analysis and  
390 molecular function enrichment further found interconnection of immune response related

391 genes, and enrichment for inflammatory response, innate immunity, and cytokine binding.  
392 When seeking replication of results in an independent sample in the ALSPAC, although no  
393 dmCpGs overlapped in the two population cohorts, results showed that effect estimates  
394 associated with fathers' preconception smoking were moderately correlated and with  
395 concordant directional effects.

396

397 Several mechanistic reports have demonstrated that the toxicogenic components in cigarette  
398 smoke impact on epigenetic germline inheritance and affect the offspring's metabolic  
399 health<sup>36</sup>. However, given this is the first study that investigated DNA methylation signatures  
400 in young and adult offspring in relation to a timing-specific exposure on father's smoking,  
401 there is limited published literature that is directly comparable to our findings. In a pilot study,  
402 we previously observed differentially methylated regions associated with father's ever  
403 smoking, among which annotated genes were related to innate and adaptive immunity and  
404 fatty acid synthesis<sup>18</sup>. Preconception paternal smoking has been shown to alter sperm DNA  
405 methylation<sup>37</sup>, and independently increase asthma risk and reduce lung function in the  
406 offspring<sup>9</sup>, especially if the smoking started before age 15<sup>7,9</sup>. The observed association  
407 between the dmCpG sites related to father's early onset smoking, and offspring asthma,  
408 wheezing and weight, suggests that epigenetic changes may lie on the casual pathway  
409 between paternal smoke exposures and offspring health outcomes.

410

411 Strikingly, the dmCpG sites we identified as related to fathers' preconception smoking (any  
412 preconception smoking as well as pubertal smoking), were quite unique and not the same as  
413 those previously reported or found in our data to be associated with mothers' or personal

414 smoking. Reassuringly, our EWAS of mother's smoking and personal smoking, identified  
415 several of the dmCpG sites related to these exposures in other cohorts.

416

417 Available data for appropriate replication of our results is a major challenge. We found  
418 moderate correlation between RHINESSA and ALSPAC EWAS for paternal smoking before 15  
419 years. Although the replication analysis found effect estimates to have concordant directions  
420 in several of the dmCpGs, we did not identify overlapping significant dmCpGs associated with  
421 fathers' preconception smoking in the replication cohort. The low sample size in both cohorts  
422 for paternal smoking before 15 might contribute to the lack of shared genome-wide  
423 significance. Even within the same population, using different platforms can cause difficulties  
424 with replication<sup>38</sup>. The similarity in the direction of association suggests a potential biological  
425 effect of early pre-puberty father's smoking, but further research is warranted in order to  
426 verify our novel results.

427

428 Although we accounted for personal and mother's smoking exposure in the analysis, we  
429 cannot disregard potential residual confounding related to maternal and personal smoking.  
430 Further, our analyses cannot fully disentangle effects of father's early onset smoking from  
431 effects of subsequent accumulating second hand smoke exposure. However, epidemiological  
432 analyses of various measures of father's smoking as related to offspring phenotype in over  
433 20,000 father-offspring pairs found that effects of any other aspect of father's smoking was  
434 negligible as compared to that of starting smoking early<sup>7</sup>. We did not control for genetic  
435 variations at single nucleotide polymorphisms and cannot rule out that the differentially  
436 methylated CpG sites are affected by, or interact with, GWAS-associated genetic variants.  
437 However, a recent analysis of our study cohorts using highly advanced statistical probabilistic

438 simulations demonstrated that unmeasured confounding had a limited impact on the effects  
439 of father's preconception smoking on offspring asthma<sup>8</sup>. This suggests that the identified  
440 dmCpGs associated with father's preconception smoking, most likely are not driven by  
441 unmeasured confounding - by genetic factors or by lifestyle-related or environmental factors.  
442  
443 Self-reporting of smoking is another limitation of our study. However, based on validation  
444 studies there is an overall consensus that self-report provides a valid and reliable tool for  
445 assessing smoking behaviour in cohort studies. Furthermore, it is likely that error in father's  
446 reporting of smoking habits is independent of DNA methylation measured in the offspring,  
447 and that misclassification thus will have attenuated the observed results and that the  
448 underlying true results might be stronger<sup>39,40</sup>.  
449  
450 We suggest that the observed association between father's preconception smoking and  
451 offspring DNA methylation marks could be caused by transmission through germline imprint  
452 of male sperm. Supported by previous mechanistic and epidemiological findings we also  
453 speculate that our novel results reflect that early adolescence may constitute a period of  
454 particular vulnerability for smoking exposure to modify the offspring's epigenome. A recent  
455 study demonstrated that preconception paternal cigarette exposure in mice from the onset  
456 of puberty until 2 days prior to mating modified the expression of miRNAs in spermatozoa  
457 and influenced the body weight of F1 progeny in early life<sup>41</sup>. As prepubertal years as well as  
458 the onset of puberty represents periods of epigenetic reprogramming events<sup>42</sup>, we suggest  
459 early adolescence may be a critical time for tobacco-related exposures to interfere with  
460 germline epigenetic patterns. This is, however, most challenging to study in humans and

461 multiple scientific approaches are needed to elucidate the molecular mechanisms underlying  
462 the current findings as well as previous epidemiological results.

463

464 **Conclusion**

465 We have identified dmCpG sites in offspring associated with father's onset of smoking before  
466 conception, with most pronounced effects when the father started to smoke already in early  
467 puberty (before the age of 15). The pattern differed from those of maternal smoking in  
468 pregnancy and of personal smoking, and we suggest these may be unique methylation  
469 signatures specific to father's early adolescent smoking. The genes to which the identified  
470 dmCpGs map, are related to asthma, IgE and regulation of innate immunity and inflammatory  
471 responses. Our study provide evidence for an epigenetic mechanism underlying the  
472 epidemiological findings of high risk of asthma, obesity and low lung function following  
473 father's early adolescent smoking. The functional links of hypermethylated genes suggest that  
474 particularly father's pubertal smoking can have cross-generational effects impacting on the  
475 long-term health in offspring. Smoking interventions in early adolescence may have  
476 implications for better public health, and potential benefits, not only for the exposed, but also  
477 for future offspring.

478  
479  
480

Table 1 A and B: General characteristics of study participants from the RHINESSA study with complete data on offspring DNA methylation and father's age of onset of tobacco smoking. A: for the full cohort of 875 offspring, and B: for the 304 offspring whose father started to smoke before age 15 years or never smoked.

| Characteristic           | A: FULL Cohort           |                           |                      | B: Start Smoking <15 years |                          |                      |
|--------------------------|--------------------------|---------------------------|----------------------|----------------------------|--------------------------|----------------------|
|                          | No, N = 547 <sup>1</sup> | Yes, N = 328 <sup>1</sup> | p-value <sup>2</sup> | No, N = 240 <sup>1</sup>   | Yes, N = 64 <sup>1</sup> | p-value <sup>3</sup> |
| <b>Sex</b>               |                          |                           | 0.8                  |                            |                          | 0.5                  |
| F                        | 263 (48%)                | 155 (47%)                 |                      | 112 (47%)                  | 33 (52%)                 |                      |
| M                        | 284 (52%)                | 173 (53%)                 |                      | 128 (53%)                  | 31 (48%)                 |                      |
| <b>Study centre</b>      |                          |                           | <0.001               |                            |                          | 0.005                |
| Albacete                 | 24 (4.4%)                | 32 (9.8%)                 |                      | 7 (2.9%)                   | 9 (14%)                  |                      |
| Arhus                    | 34 (6.2%)                | 17 (5.2%)                 |                      | 14 (5.8%)                  | 1 (1.6%)                 |                      |
| Bergen                   | 320 (59%)                | 194 (59%)                 |                      | 174 (72%)                  | 47 (73%)                 |                      |
| Huelva                   | 17 (3.1%)                | 14 (4.3%)                 |                      | 5 (2.1%)                   | 2 (3.1%)                 |                      |
| Melbourne                | 78 (14%)                 | 14 (4.3%)                 |                      | 21 (8.8%)                  | 1 (1.6%)                 |                      |
| Tartu                    | 74 (14%)                 | 57 (17%)                  |                      | 19 (7.9%)                  | 4 (6.2%)                 |                      |
| <b>Age</b>               | 26 (8)                   | 30 (8)                    | <0.001               | 26 (8)                     | 27 (8)                   | 0.2                  |
| <b>Mother smoking</b>    | 84 (15%)                 | 179 (55%)                 | <0.001               | 30 (12%)                   | 34 (53%)                 | <0.001               |
| <b>Offspring Smoking</b> | 121 (22%)                | 119 (36%)                 | <0.001               | 44 (18%)                   | 25 (39%)                 | <0.001               |
| <b>B-cells</b>           | 0.022 (0.019)            | 0.020 (0.016)             | 0.4                  | 0.022 (0.016)              | 0.020 (0.015)            | 0.4                  |
| <b>CD4-cells</b>         | 0.030 (0.031)            | 0.032 (0.032)             | 0.3                  | 0.026 (0.026)              | 0.026 (0.024)            | >0.9                 |
| <b>CD8-cells</b>         | 0.13 (0.05)              | 0.12 (0.05)               | 0.5                  | 0.13 (0.04)                | 0.12 (0.04)              | 0.7                  |
| <b>NK-cells</b>          | 0.07 (0.04)              | 0.07 (0.04)               | 0.8                  | 0.07 (0.04)                | 0.07 (0.04)              | 0.4                  |
| <b>Mononuclear cells</b> | 0.073 (0.022)            | 0.071 (0.020)             | 0.2                  | 0.074 (0.020)              | 0.071 (0.020)            | 0.4                  |
| <b>Neutrophil</b>        | 0.67 (0.09)              | 0.68 (0.08)               | 0.3                  | 0.68 (0.08)                | 0.68 (0.07)              | 0.8                  |

<sup>1</sup> n (%); Mean (SD)  
<sup>2</sup> Pearson's Chi-squared test; Wilcoxon rank sum test  
<sup>3</sup> Pearson's Chi-squared test; Fisher's exact test; Wilcoxon rank sum test

481  
482  
483

\*Including father never smoked and father started smoking after birth of the offspring

*Kitaba et al*

484  
485  
486  
487

**Table 2A and B.** CpG sites associated with father’s smoking at genome wide significance (FDR<0.05) **A:** for father’s any preconception smoking, in the full cohort (N=875), and **B:** for father’s smoking starting before age 15 years, in the subpopulation (N=304).

| Fathers’ smoking                        | CpG        | Coefficient* | Average** | SD    | Adj.P*** | Gene    | Location**** |
|-----------------------------------------|------------|--------------|-----------|-------|----------|---------|--------------|
| A: Any preconception smoking onset      | cg00870527 | -0.024       | 0.5       | 0.07  | 0.028    | PRR5    | N_Shelf      |
|                                         | cg08541349 | -0.012       | 0.88      | 0.023 | 0.028    | CENPP   | OpenSea      |
| B: Fathers’ smoking onset before age 15 | cg23021329 | 0.015        | 0.27      | 0.021 | 0.026    | TLR9    | S_Shore      |
|                                         | cg20728490 | 0.032        | 0.37      | 0.049 | 0.026    | DNTT    | OpenSea      |
|                                         | cg12053348 | 0.036        | 0.61      | 0.056 | 0.026    | NA      | OpenSea      |
|                                         | cg03380960 | 0.019        | 0.48      | 0.045 | 0.034    | FAM53B  | OpenSea      |
|                                         | cg26274304 | 0.018        | 0.36      | 0.027 | 0.037    | NCAPG2  | N_Shore      |
|                                         | cg16730908 | 0.021        | 0.39      | 0.032 | 0.037    | PSTPIP2 | S_Shore      |
|                                         | cg13904562 | 0.041        | 0.53      | 0.056 | 0.037    | NA      | OpenSea      |
|                                         | cg07508217 | 0.026        | 0.69      | 0.042 | 0.037    | NA      | OpenSea      |
|                                         | cg03516318 | 0.028        | 0.21      | 0.039 | 0.037    | MBIP    | OpenSea      |
|                                         | cg10883621 | 0.02         | 0.35      | 0.032 | 0.037    | C2orf39 | Island       |
|                                         | cg22402007 | 0.022        | 0.16      | 0.031 | 0.041    | NTRK2   | N_Shore      |
|                                         | cg11380624 | 0.024        | 0.27      | 0.036 | 0.041    | DNAJC14 | N_Shore      |
|                                         | cg15882605 | 0.025        | 0.44      | 0.051 | 0.041    | NA      | OpenSea      |
|                                         | cg03818156 | 0.017        | 0.9       | 0.028 | 0.041    | NA      | OpenSea      |
|                                         | cg13288863 | 0.02         | 0.79      | 0.049 | 0.048    | CDO1    | N_Shore      |
|                                         | cg03743584 | 0.018        | 0.3       | 0.025 | 0.048    | PRAP1   | OpenSea      |
|                                         | cg10981514 | 0.023        | 0.42      | 0.042 | 0.048    | TPCN1   | OpenSea      |
| cg06600694                              | 0.005      | 0.06         | 0.008     | 0.048 | IRS1     | Island  |              |
| cg14700085                              | 0.016      | 0.71         | 0.024     | 0.050 | CSF1R    | OpenSea |              |

488  
489  
490  
491  
492  
493  
494  
495  
496  
497

\* Coefficient: Regression coefficient between father smoking/not smoking  
 \*\* Average methylation across all samples  
 \*\*\* adj.P.Val: FDR adjusted p value  
 \*\*\*\* N (north) Shelf: up to 2 kb outward from flanking shores; Open Sea: > 4 kb from CpG islands; N (north) and S (south) Shores: up to 2 kb from flanking CpG islands

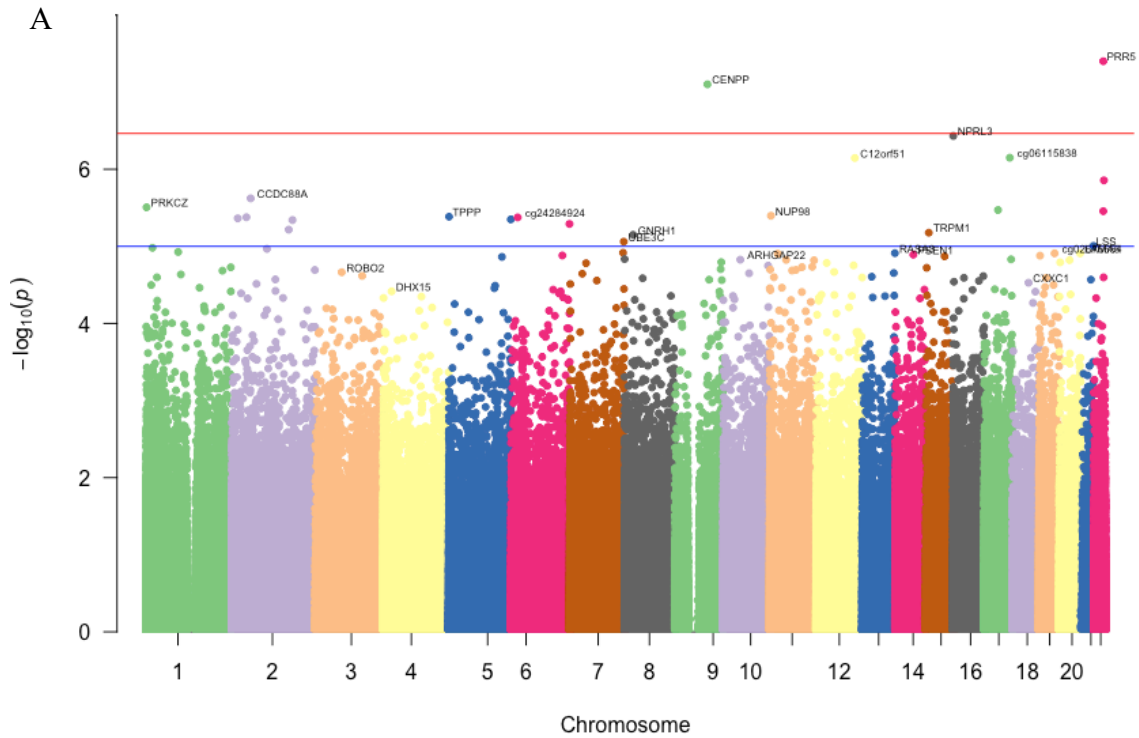

498  
499

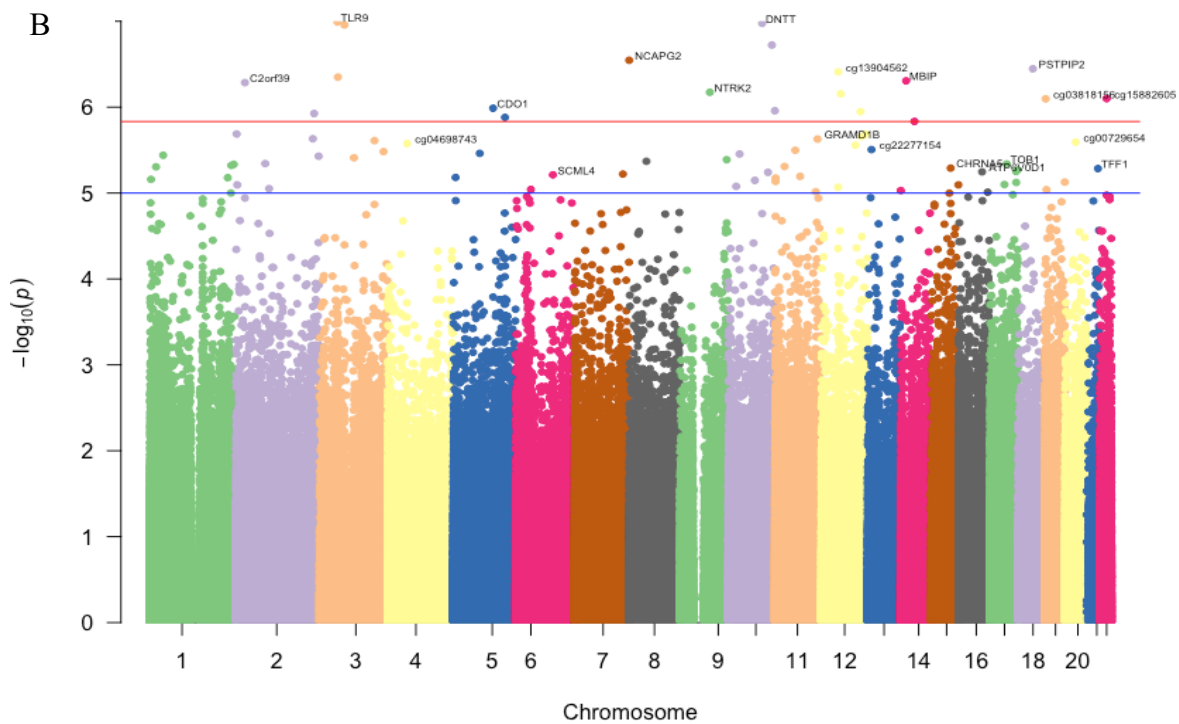

500  
501  
502  
503  
504  
505  
506  
507  
508

**Figure 1A and B.** Manhattan plot for Genome-wide distribution of dmCpGs **A:** for father's any preconception smoking, and **B:** father's pubertal smoking starting before age 15. The red line shows genome-wide significance, the blue is the suggestive line. The y-axis represents  $-\log_{10}$  of the p-value for each dmCpG (indicated by dots) showing the strength of association. The x-axis shows the position across autosomal chromosomes. The top dmCpGs on each chromosome were annotated to the closest gene.



509  
510  
511  
512  
513  
514  
515  
516  
517  
518  
519  
520  
521  
522  
523  
524  
525  
526  
527  
528  
529  
530  
531  
532  
533  
534  
535  
536  
537  
538  
539  
540  
541  
542  
543  
544  
545  
546  
547  
548

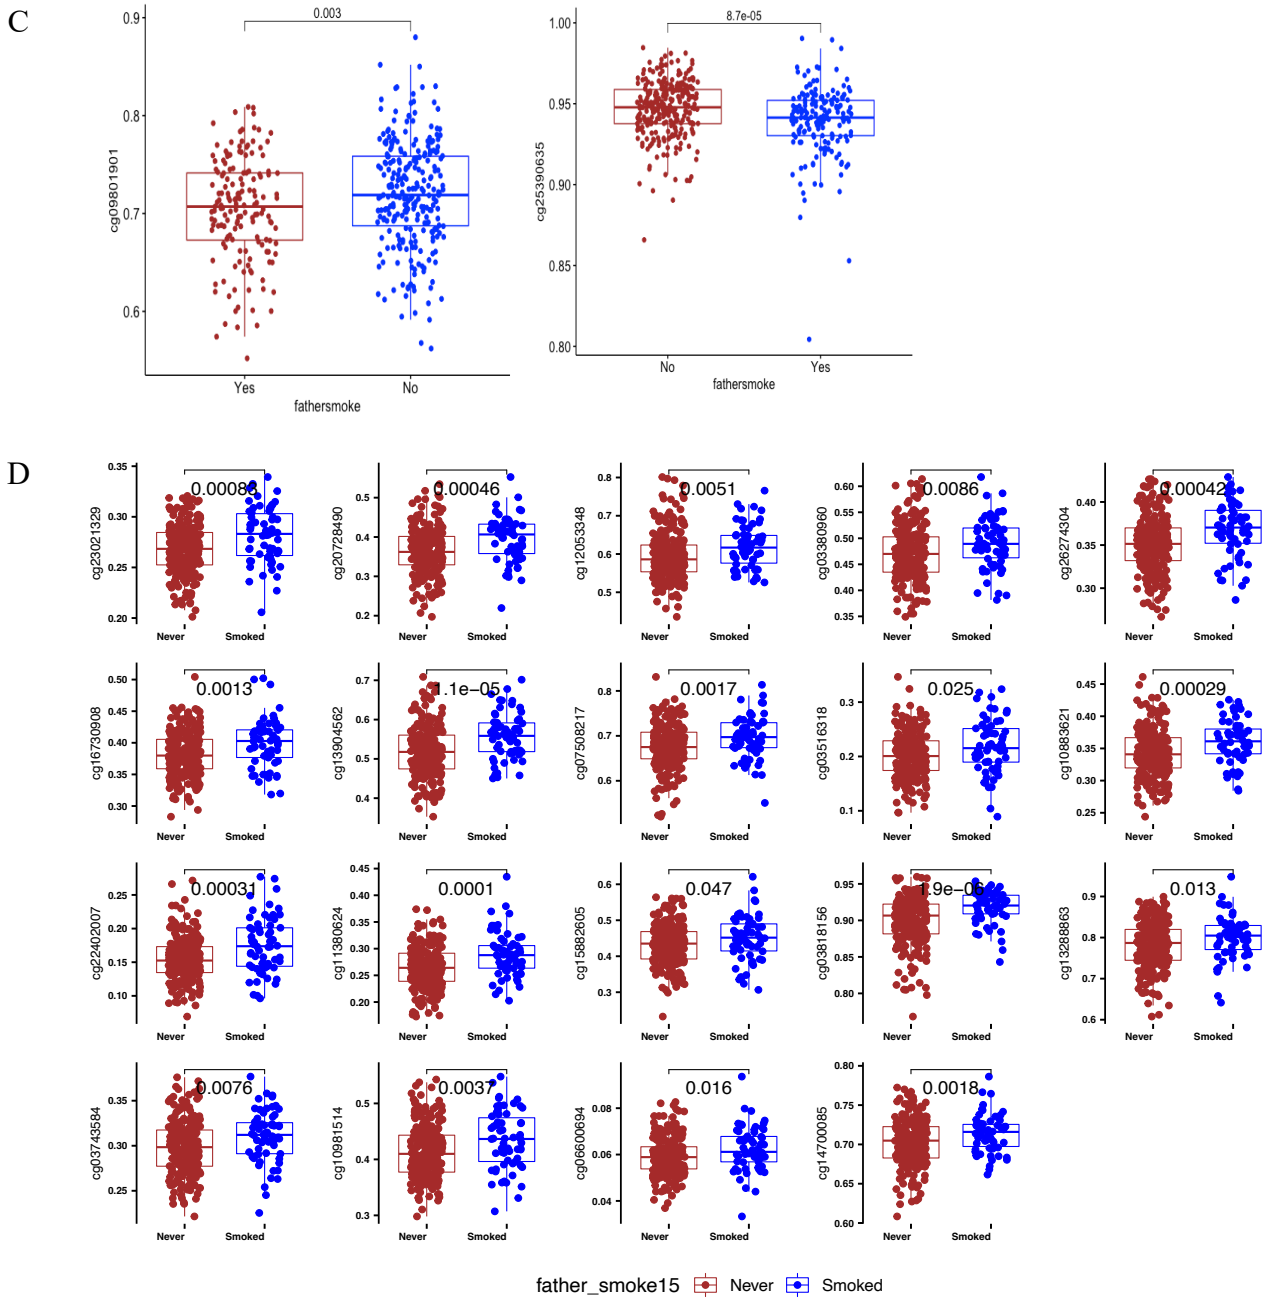

**Figure 1C and D.** Comparison of methylation differences for **C:** for father's any preconception smoking, and **D:** for father's pubertal smoking starting before age 15.

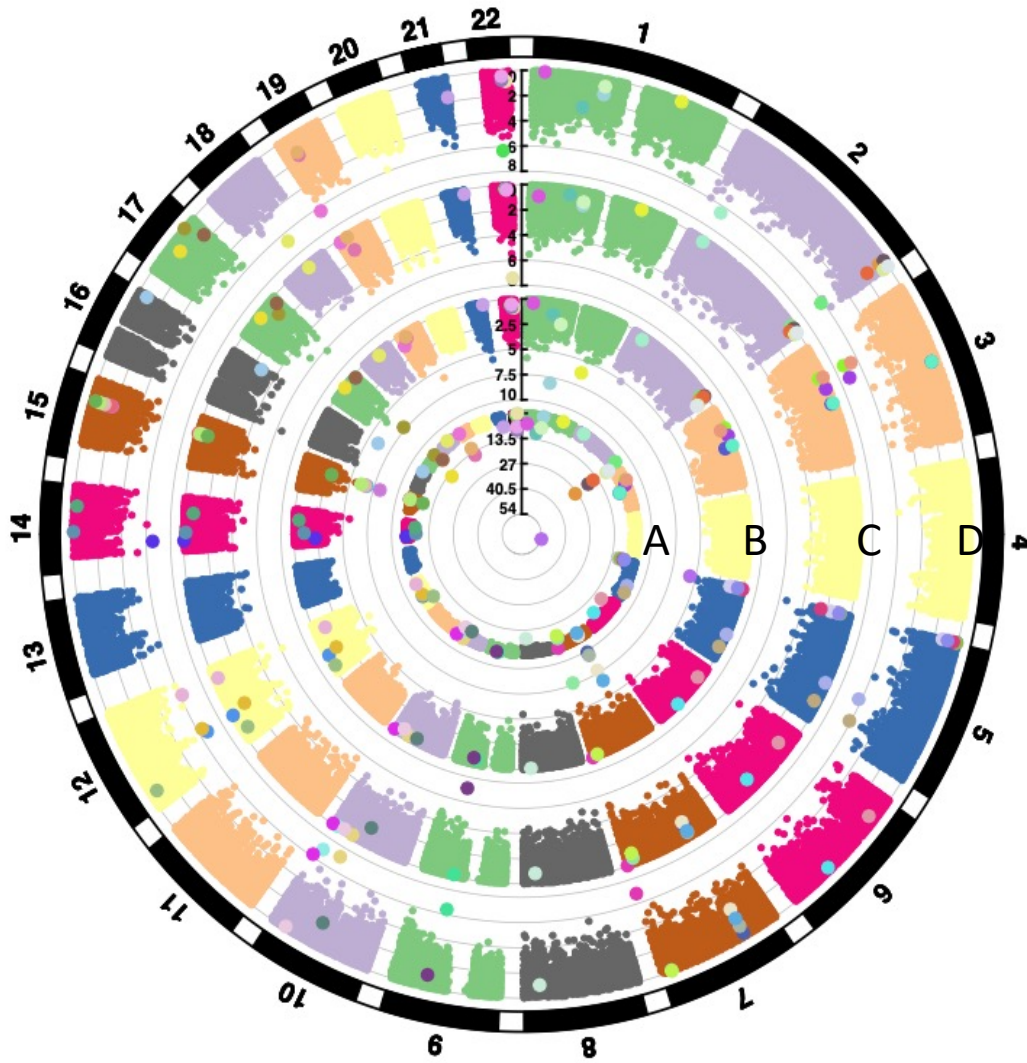

549  
550

551 **Figure 2A.** Circos plots showing genome-wide distribution across autosomal chromosomes of  
552 dmCpGs associated with **A:** personal smoking (in offspring), **B:** mother's smoking, **C:** father's  
553 any preconception smoking, and **D:** father's pubertal smoking starting before age 15. Each  
554 dot represents a CpG site; the radial line shows the  $-\log_{10}$  p-value for each EWAS. Zoomed  
555 dots show significant sites in one of the EWAS; each zoomed dot colour shows a unique CpG  
556 site specific locus in all 4 EWASs.

557  
558  
559

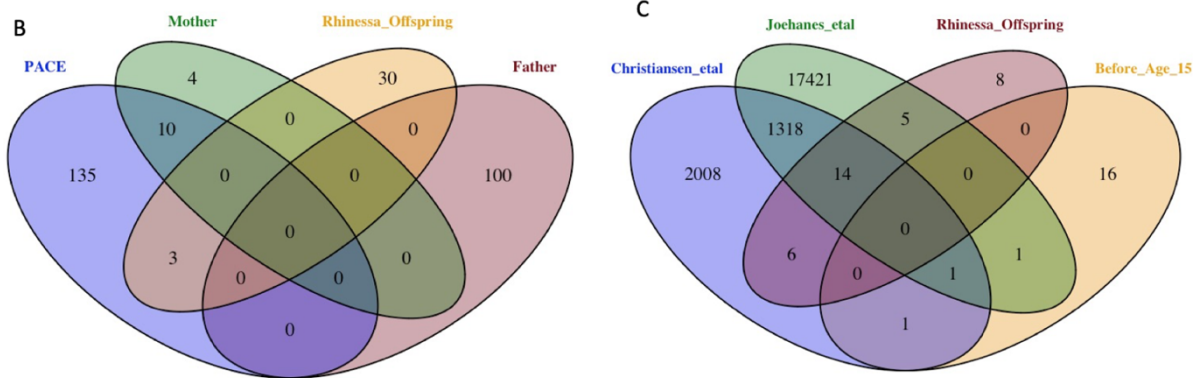

560  
561  
562  
563  
564  
565  
566  
567

**Figure 2B and C.** Venn diagram showing EWAS CpG top hits for personal smoking, mother's smoking (FDR<0.005), father's any preconception smoking (top 100 dmCpGs), and father's pubertal smoking starting before age 15 (FDR<0.05) in the RHINESSA cohort, which are shared with top hits from meta-analysis of **B**: mother smoking (blue oval) as reported by Joubert et al 2016, and **C**: personal cigarette smoking signature as reported by Christiansen et al 2021 (blue) and by Joehanes et al 2016 (green).

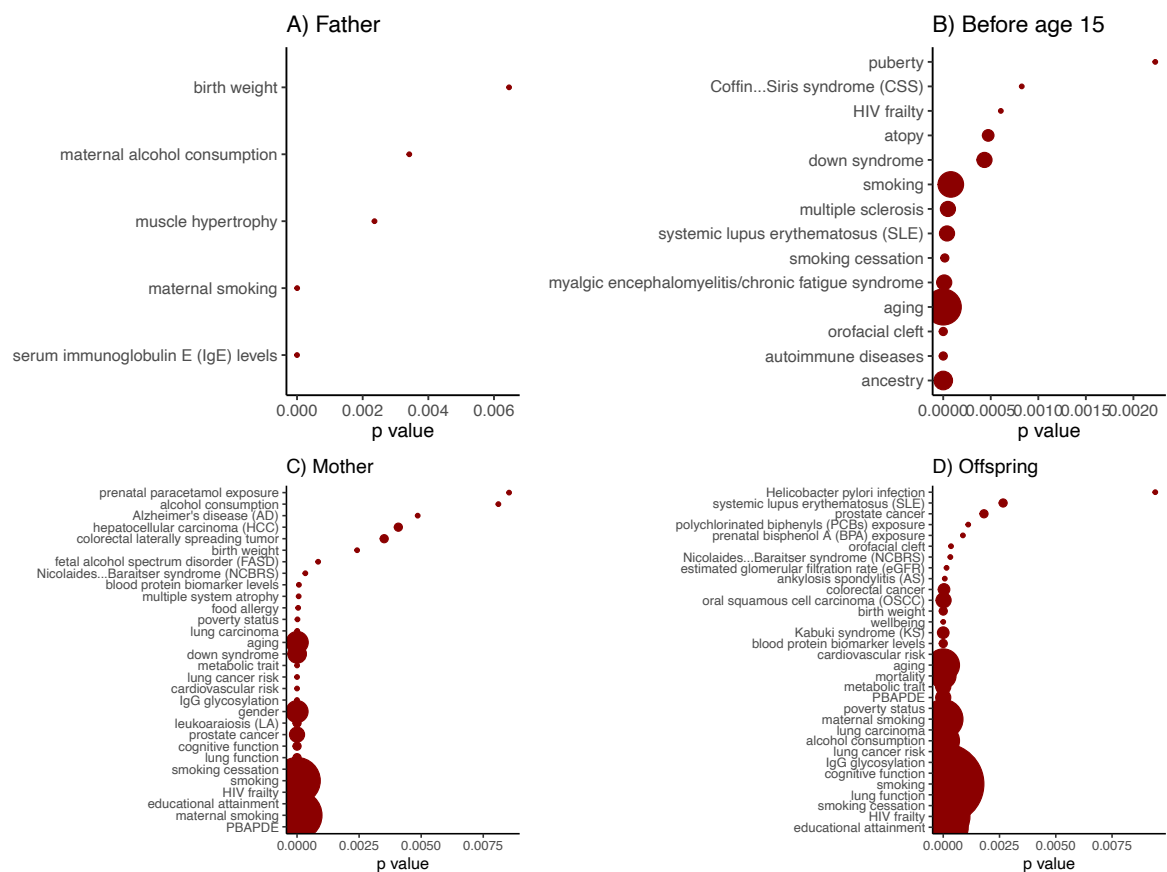

568  
569  
570  
571  
572  
573  
574

**Figure 3:** Traits associated with the CpG sites that in EWAS were identified to be differentially methylated according to **A**: father's any preconception smoking, **B**: father's pubertal smoking starting before age 15, **C**: Mother's smoking and **D**: personal smoking

\*PPBAPDE: perinatal polychlorinated biphenyls and polychlorinated dibenzofurans exposure

575  
576  
577

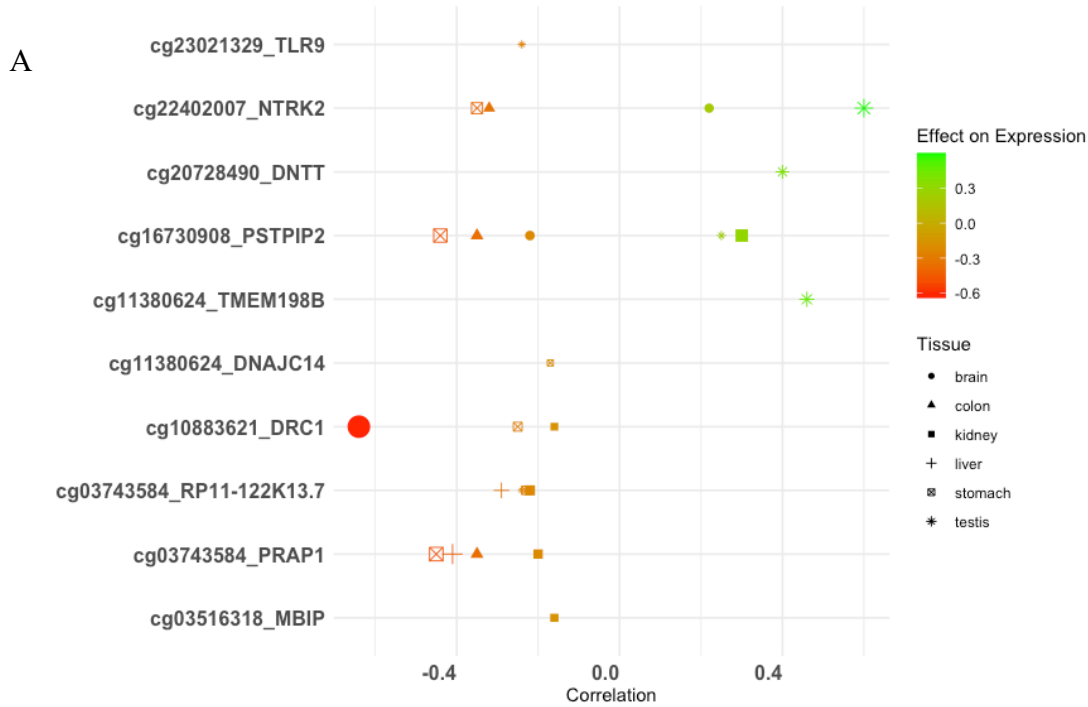

596

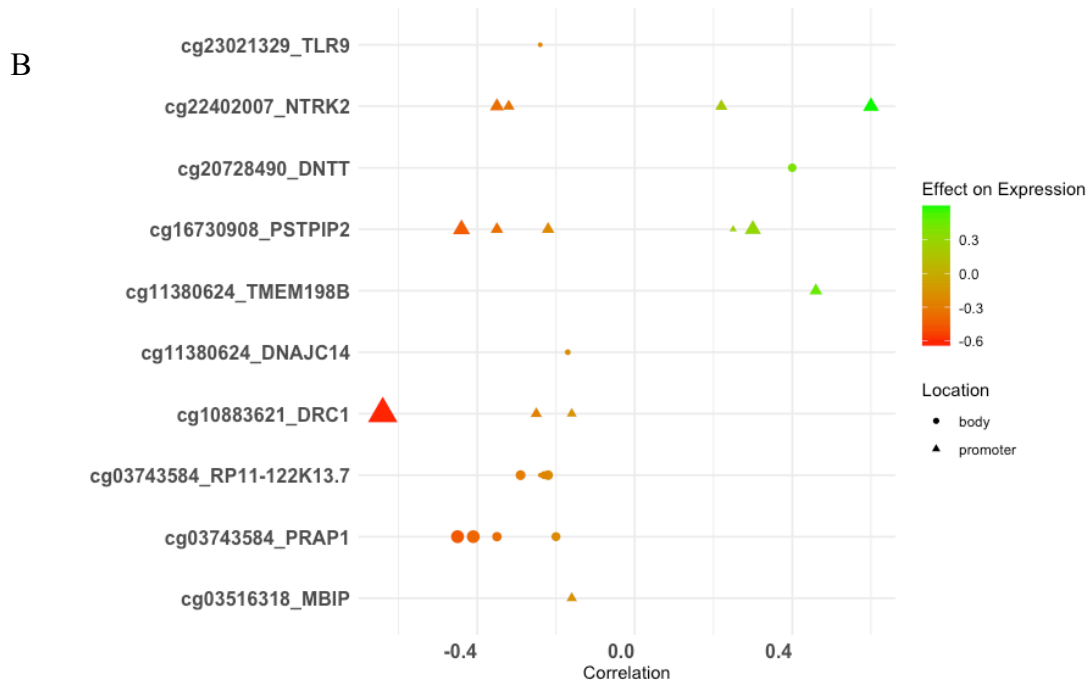

614

615 **Figure 4:** Methylation effects on gene expression regulation across different tissue types for  
616 the CpG sites differently methylated according to father's pubertal smoking starting before  
617 age 15 years (FDR < 0.05). [Accessed on 20 June 2021]. Size of point represents  $-\log_{10}$  p-  
618 value, colour scale shows CpG site correlation with expression; red to green represents  
619 increasing expression. In A) shape shows the tissue type, in B) shape shows genomic feature  
620 location.

621

622  
623  
624  
625  
626  
627  
628  
629  
630  
631  
632  
633  
634  
635  
636  
637  
638  
639  
640  
641  
642  
643  
644  
645  
646  
647  
648  
649  
650  
651  
652  
653  
654  
655  
656  
657  
658  
659  
660  
661  
662  
663  
664  
665  
666  
667  
668

A

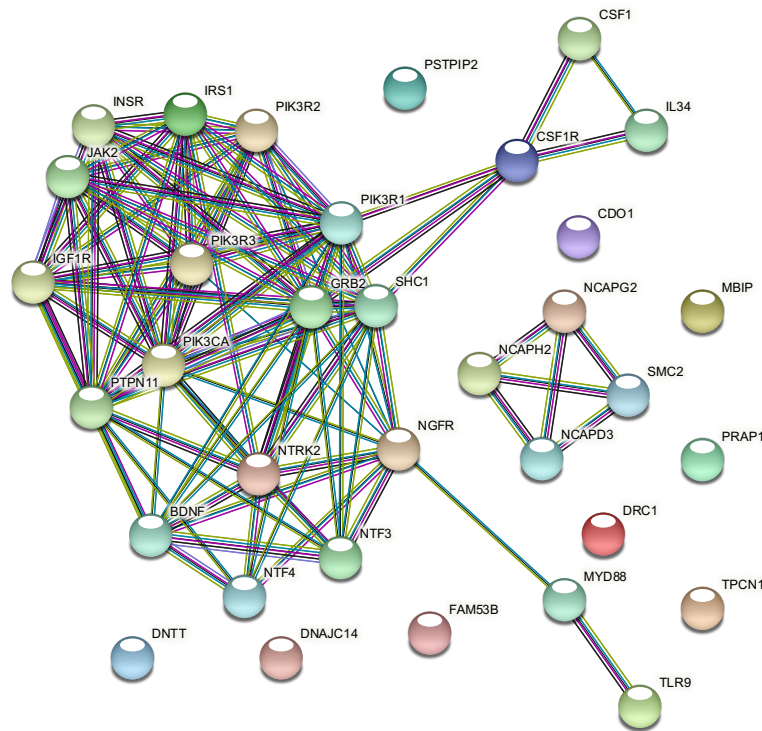

B

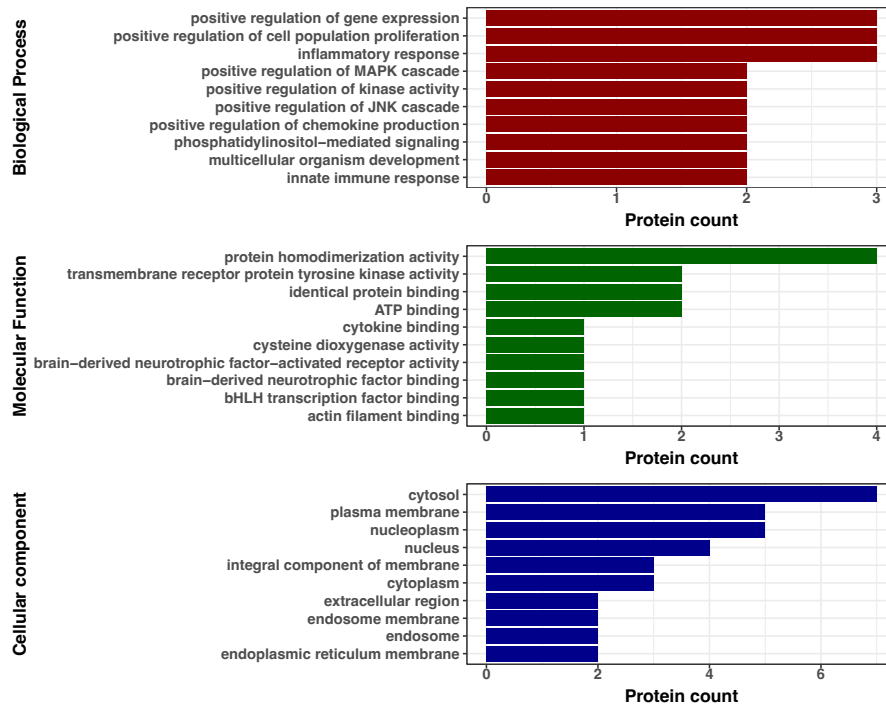

**Figure 5A and B.** Interactome of dmCpGs associated with father's pubertal smoking starting before age 15 (FDR < 0.05). **A:** Network with high confidence score 0.7 and 20 top interactors. The interaction line colour shows dataset source: Red = experimentally determined, cyan = curated database, yellow-green = text mining. **B:** Functional enrichment for gene expression regulation, inflammatory response and innate immunity.

669 **References**

- 670 1. Skinner, M. K., Haque, C. G. B. M., Nilsson, E., Bhandari, R. & McCarrey, J. R.  
671 Environmentally Induced Transgenerational Epigenetic Reprogramming of Primordial  
672 Germ Cells and the Subsequent Germ Line. *PLoS One* **8**, (2013).
- 673 2. Senaldi, L. & Smith-raska, M. Evidence for germline non-genetic inheritance of human  
674 phenotypes and diseases. 1–12 (2020).
- 675 3. Hamad, M. F. *et al.* The status of global DNA methylation in the spermatozoa of  
676 smokers and non-smokers. *Reprod. Biomed. Online* **37**, 581–589 (2018).
- 677 4. Fernandez-Twinn, D. S., Constância, M. & Ozanne, S. E. Intergenerational epigenetic  
678 inheritance in models of developmental programming of adult disease. *Semin. Cell*  
679 *Dev. Biol.* **43**, 85–95 (2015).
- 680 5. Marcon, A. *et al.* Trends in smoking initiation in Europe over 40 years: A retrospective  
681 cohort study. *PLoS One* **13**, 1–14 (2018).
- 682 6. Pesce, G. *et al.* Time and age trends in smoking cessation in Europe. *PLoS One* **14**,  
683 2000–2010 (2019).
- 684 7. Svanes, C. *et al.* Father’s environment before conception and asthma risk in his  
685 children: A multi-generation analysis of the Respiratory Health In Northern Europe  
686 study. *Int. J. Epidemiol.* **46**, 235–245 (2017).
- 687 8. Accordini, S. *et al.* A three-generation study on the association of tobacco smoking  
688 with asthma. *Int. J. Epidemiol.* **47**, 1106–1117 (2018).
- 689 9. Accordini, S. *et al.* Prenatal and prepubertal exposures to tobacco smoke in men may  
690 cause lower lung function in future offspring: a three-generation study using a causal  
691 modelling approach. *Eur. Respir. J.* 2002791 (2021) doi:10.1183/13993003.02791-  
692 2020.
- 693 10. Northstone, K., Golding, J., Davey Smith, G., Miller, L. L. & Pembrey, M. Prepubertal  
694 start of father’s smoking and increased body fat in his sons: further characterisation  
695 of paternal transgenerational responses. *Eur. J. Hum. Genet.* **22**, 1382–1386 (2014).
- 696 11. Golding, J. *et al.* Investigating possible trans/intergenerational associations with  
697 obesity in young adults using an exposome approach. *Front. Genet.* **10**, 1–11 (2019).
- 698 12. Knudsen, G. T. M. *et al.* Parents’ smoking onset before conception as related to body  
699 mass index and fat mass in adult offspring: Findings from the RHINESSA generation  
700 study. *PLoS One* **15**, 1–21 (2020).
- 701 13. Golding, J. *et al.* Human transgenerational observations of regular smoking before  
702 puberty on fat mass in grandchildren and great-grandchildren. *Sci. Rep.* **12**, 1–8  
703 (2022).
- 704 14. Breton, C. V. *et al.* Prenatal tobacco smoke exposure affects global and gene-specific  
705 DNA methylation. *Am. J. Respir. Crit. Care Med.* **180**, 462–467 (2009).
- 706 15. Morrow, J. D. *et al.* DNA Methylation is predictive of mortality in current and former  
707 smokers. *Am. J. Respir. Crit. Care Med.* **201**, 1099–1109 (2020).
- 708 16. Joehanes, R. *et al.* Epigenetic Signatures of Cigarette Smoking. *Circ. Cardiovasc.*  
709 *Genet.* **9**, 436–447 (2016).
- 710 17. Joubert, B. R. *et al.* DNA Methylation in Newborns and Maternal Smoking in  
711 Pregnancy: Genome-wide Consortium Meta-analysis. *Am. J. Hum. Genet.* **98**, 680–696  
712 (2016).
- 713 18. Mørkve Knudsen, G. T. *et al.* Epigenome-wide association of father’s smoking with  
714 offspring DNA methylation: A hypothesis-generating study. *Environ. Epigenetics* **5**, 1–  
715 10 (2019).

- 716 19. Wu, C. C. *et al.* Paternal tobacco smoke correlated to offspring asthma and prenatal  
717 epigenetic programming. *Front. Genet.* **10**, (2019).
- 718 20. Rutkowska, J., Lagisz, M., Bonduriansky, R. & Nakagawa, S. Mapping the past, present  
719 and future research landscape of paternal effects. *BMC Biol.* **18**, 1–24 (2020).
- 720 21. Christiansen, C. *et al.* Novel DNA methylation signatures of tobacco smoking with  
721 trans-ethnic effects. *Clin. Epigenetics* **13**, 1–13 (2021).
- 722 22. Joubert, B. R. *et al.* DNA Methylation in Newborns and Maternal Smoking in  
723 Pregnancy: Genome-wide Consortium Meta-analysis. *Am. J. Hum. Genet.* **98**, 680–696  
724 (2016).
- 725 23. Mestrus, S. J. *et al.* Variants close to NTRK2 gene are associated with birth weight in  
726 female twins. *Twin Res. Hum. Genet.* **17**, 254–261 (2014).
- 727 24. Yuefeng, TanMartina, W. *et al.* Adipose tissue mTORC2 regulates ChREBP-driven de  
728 novo lipogenesis and hepatic glucose metabolism. *Nat. Commun.* **16**, (2016).
- 729 25. Carvalho-Silva, D. *et al.* Open Targets Platform: New developments and updates two  
730 years on. *Nucleic Acids Res.* **47**, D1056–D1065 (2019).
- 731 26. Chen, W. *et al.* An epigenome-wide association study of total serum IgE in Hispanic  
732 children. *J. Allergy Clin. Immunol.* **140**, 571–577 (2017).
- 733 27. Touvier, T. *et al.* LEPROT and LEPROTL1 cooperatively decrease hepatic growth  
734 hormone action in mice. *J. Clin. Invest.* **119**, 3830–3838 (2009).
- 735 28. Haeryfar, S. M. M. *et al.* Terminal Deoxynucleotidyl Transferase Establishes and  
736 Broadens Anti-Viral CD8+ T Cell Immunodominance Hierarchies. **181**, 649–659 (2009).
- 737 29. Chitu, V. *et al.* Primed innate immunity leads to autoinflammatory disease in PSTPIP2-  
738 deficient cmo mice. *Blood* **114**, 2497–2505 (2009).
- 739 30. Murakami, Y. *et al.* TLR9–IL-2 axis exacerbates allergic asthma by preventing IL-17A  
740 hyperproduction. *Sci. Rep.* **10**, 1–17 (2020).
- 741 31. Boulakirba, S. *et al.* IL-34 and CSF-1 display an equivalent macrophage differentiation  
742 ability but a different polarization potential. *Sci. Rep.* **8**, 1–11 (2018).
- 743 32. Modena, B. D. *et al.* Gene expression correlated with severe asthma characteristics  
744 reveals heterogeneous mechanisms of severe disease. *Am. J. Respir. Crit. Care Med.*  
745 **195**, 1449–1463 (2017).
- 746 33. Shin, E. K. *et al.* Association between colony-stimulating factor 1 receptor gene  
747 polymorphisms and asthma risk. *Hum. Genet.* **128**, 293–302 (2010).
- 748 34. Caruso, M. *et al.* Increased interaction with insulin receptor substrate 1, a novel  
749 abnormality in insulin resistance and type 2 diabetes. *Diabetes* **63**, 1933–1947 (2014).
- 750 35. Kubota, N. *et al.* Differential hepatic distribution of insulin receptor substrates causes  
751 selective insulin resistance in diabetes and obesity. *Nat. Commun.* **7**, 1–16 (2016).
- 752 36. Ng, S. F. *et al.* Paternal high-fat diet consumption induces common changes in the  
753 transcriptomes of retroperitoneal adipose and pancreatic islet tissues in female rat  
754 offspring. *FASEB J.* **28**, 1830–1841 (2014).
- 755 37. Lakhani, C. M. Cigarette Smoking Significantly Alters Sperm DNA Methylation  
756 Patterns. *Physiol. Behav.* **176**, 139–148 (2019).
- 757 38. Watkins, S. H., Iles-Caven, Y., Pembrey, M., Golding, J. & Suderman, M.  
758 Grandmaternal smoking during pregnancy is associated with differential DNA  
759 methylation in peripheral blood of their grandchildren. *Eur. J. Hum. Genet.* (2022)  
760 doi:10.1038/s41431-022-01081-2.
- 761 39. Chiu, Y. L. *et al.* Validation of Self-reported Smoking with Urinary Cotinine Levels and  
762 Influence of Second-hand Smoke among Conscripts. *Sci. Rep.* **7**, 1–7 (2017).

- 763 40. Valladolid-López, M. D. C. *et al.* Evaluating the validity of self-reported smoking in  
764 Mexican adolescents. *BMJ Open* **5**, 1–8 (2015).
- 765 41. Hammer, B. *et al.* Preconceptional smoking alters spermatozoal miRNAs of murine  
766 fathers and affects offspring's body weight. *Int. J. Obes.* 1623–1627 (2021)  
767 doi:10.1038/s41366-021-00798-2.
- 768 42. Ly, L., Chan, D. & Trasler, J. M. Developmental windows of susceptibility for  
769 epigenetic inheritance through the male germline. *Semin. Cell Dev. Biol.* **43**, 96–105  
770 (2015).  
771
